# Supplementary material for: Robocasting of biomimetic hydroxyapatite scaffolds using self-setting inks
Source: Royal Society of Chemistry journal article supplement (doi:10.1039/c4tb00438h), 2014-01-01
Supplement: c4tb00438h1.pdf [file c4tb00438h1.pdf]

Maazouz et al.

SUPPLEMENTARY INFORMATION

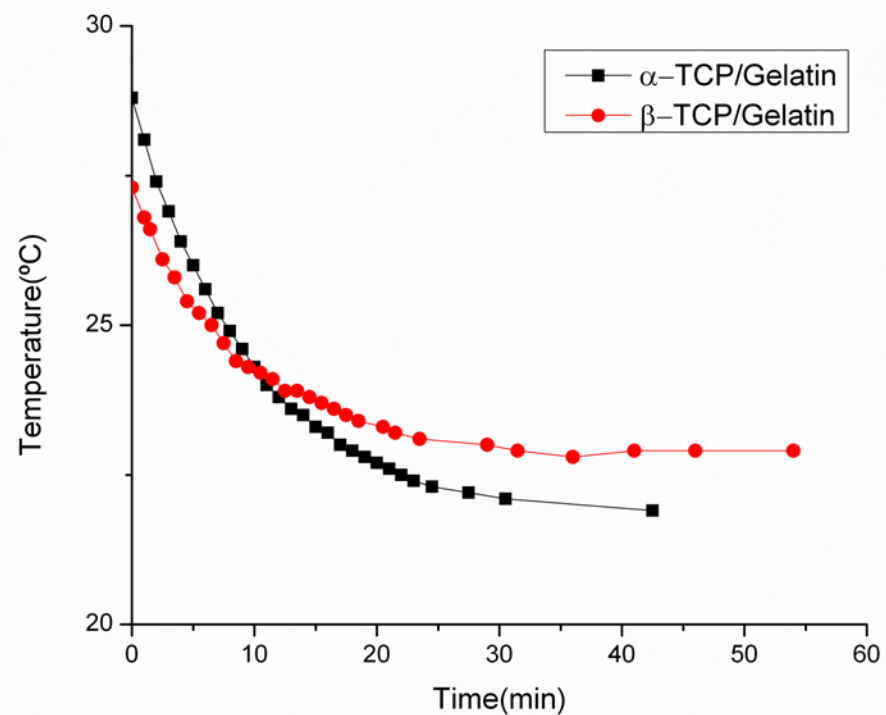

Figure S1. Cooling Curves of the different tricalcium phosphate (TCP) inks prepared with gelatine, measured by placing a termocouple inside the paste. Note that the temperature of the inks just after mixing was around 28 °C. Room temperature was 22.5 °C.

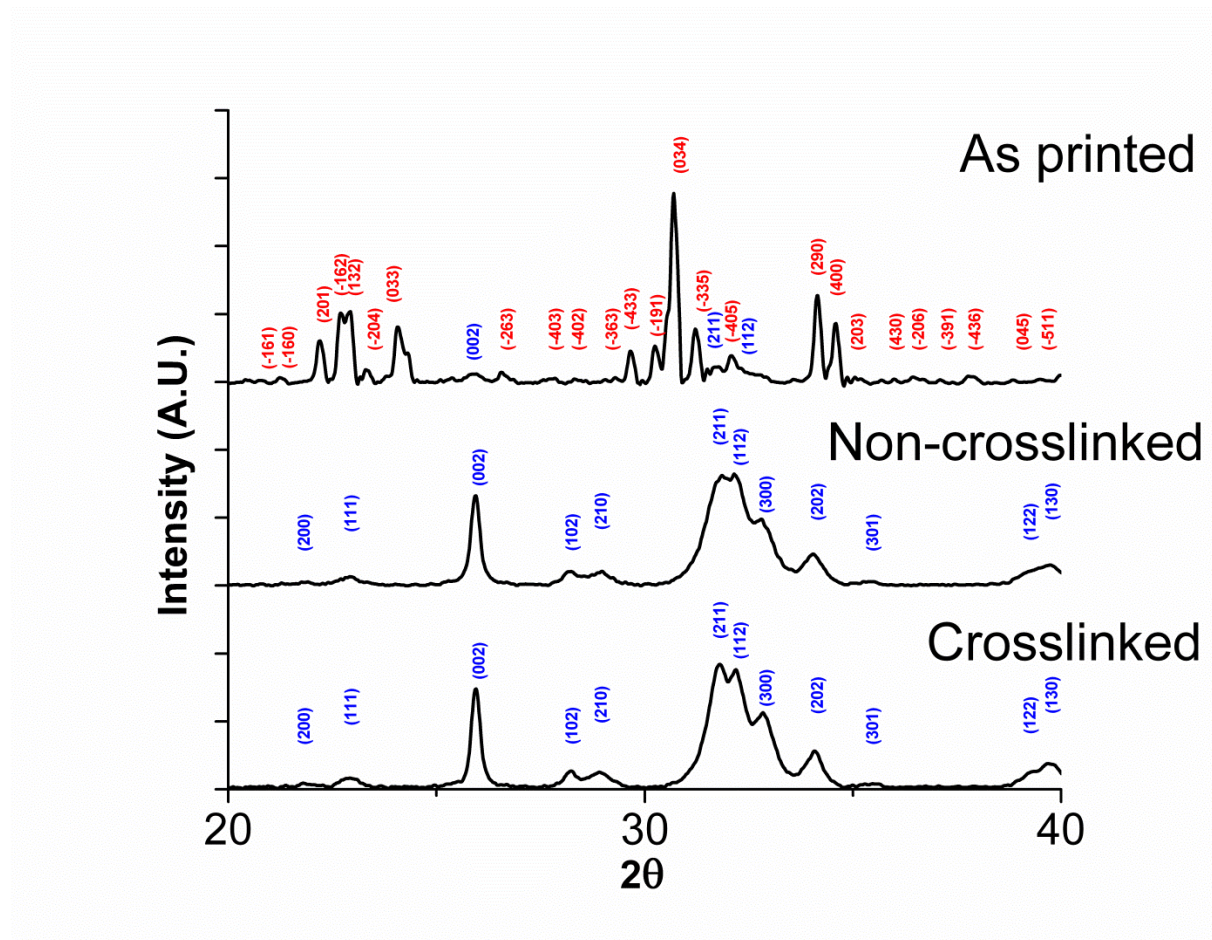

Figure S2. Indexed diffractograms with the different reflections hkl in blue for calcium deficient hydroxyapatite and in red for  $\alpha$ -TCP.

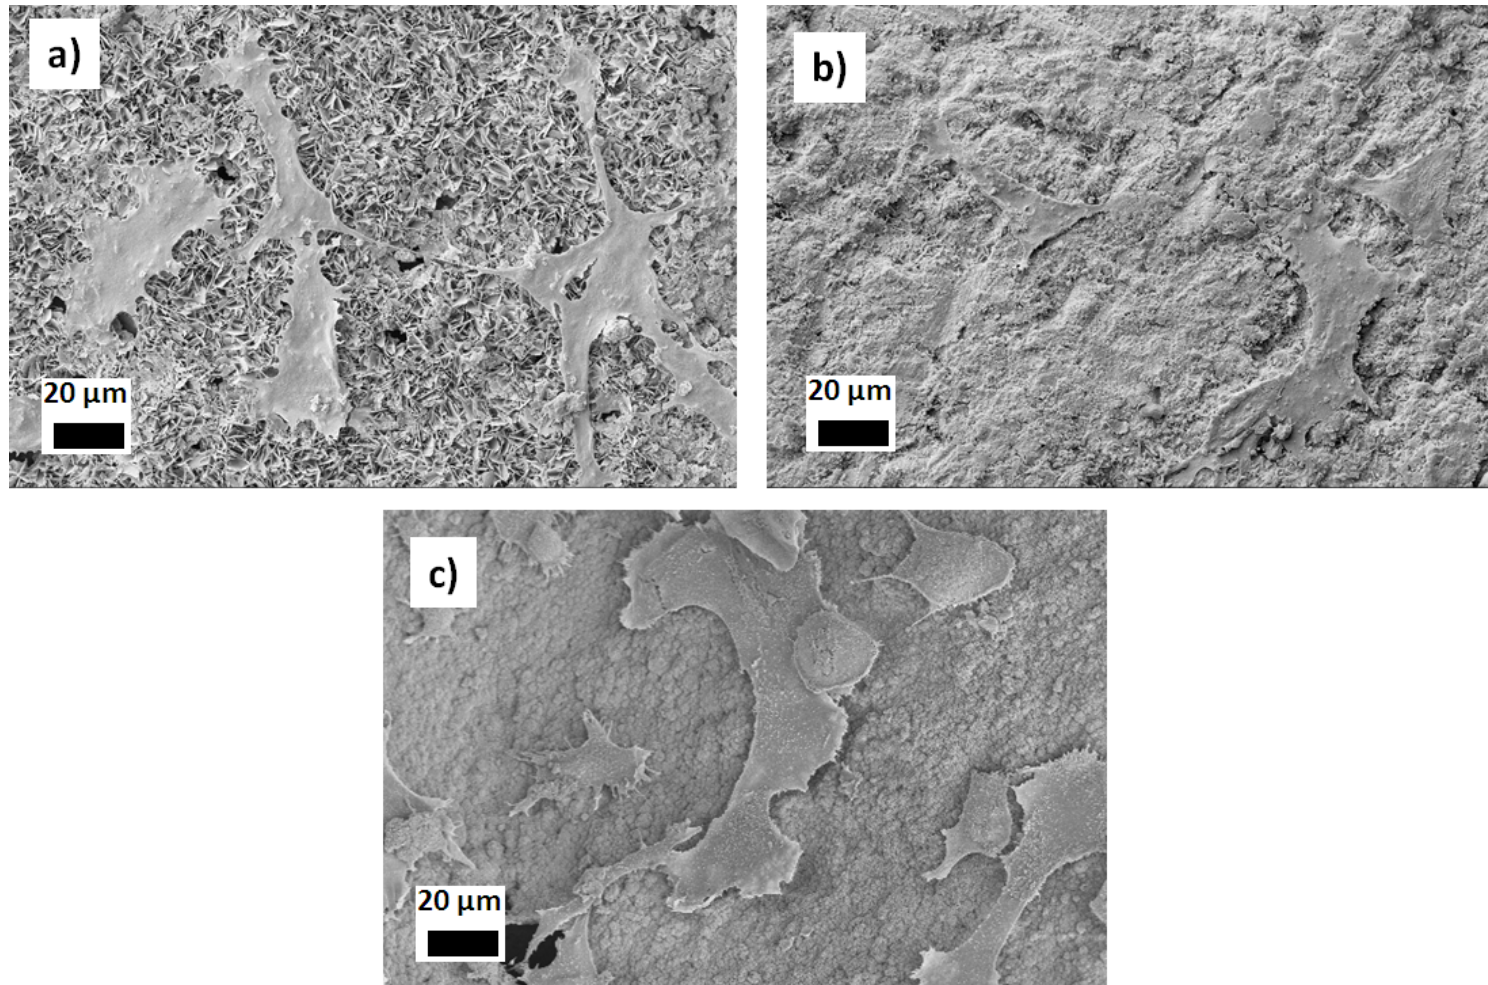

Figure S3. Cell morphology on the different samples: a) set  $\alpha$ -TCP; b) non-crosslinked  $\alpha$ -TCP/gelatine set scaffold and c) crosslinked  $\alpha$ -TCP/gelatine set scaffold, after 5 h of culture
